# Supplementary material for: Enhanced photocurrent generation by folding-driven H-aggregate formation
Source: Royal Society of Chemistry journal article supplement (doi:10.1039/c3sc50263e), 2013-01-01
Supplement: c3sc50263e.pdf [file c3sc50263e.pdf]

## Electronic Supporting Information

### Enhanced photocurrent generation by folding-driven H-aggregate formation

André Zitzler-Kunkel, Martin R. Lenze, Klaus Meerholz,\* and Frank Würthner\*

A. Zitzler-Kunkel, Prof. Dr. F. Würthner  
Universität Würzburg, Institut für Organische Chemie and Center for Nanosystems Chemistry  
Am Hubland, 97074 Würzburg (Germany)  
E-mail: wuerthner@chemie.uni-wuerzburg.de

M. R. Lenze, Prof. Dr. K. Meerholz  
Department of Chemistry, Universität zu Köln  
Luxemburger Straße 116, 50939 Köln (Germany)  
E-mail: klaus.meerholz@uni-koeln.de

## Table of Contents

|                                                       |     |
|-------------------------------------------------------|-----|
| 1 Experimental .....                                  | S3  |
| 1.1 Materials and Methods .....                       | S3  |
| 1.2 Synthesis.....                                    | S3  |
| 1.2.1 Synthesis of the bis(pyridone) precursor 2..... | S3  |
| 1.2.2 Synthesis of the bis(merocyanine) dye 4.....    | S4  |
| 2 UV/vis absorption spectra .....                     | S5  |
| 3 Structure elucidation by NMR spectroscopy .....     | S8  |
| 4 $K_{eq}$ and $\Delta G$ values for folding .....    | S10 |
| 5 BHJ solar cells.....                                | S12 |
| 5.1 Device fabrication and characterization.....      | S12 |
| 5.2 UV/vis and BHJ solar cell data .....              | S13 |
| 6 $^1\text{H}$ NMR spectra .....                      | S15 |
| 7 Additional references .....                         | S16 |

## 1 Experimental

### 1.1 Materials and methods

All solvents and reagents were purchased from commercial sources and used as received without further purification, unless otherwise stated. The starting compound **1** was prepared according to literature procedure.<sup>S1</sup> Column chromatography was performed using silica gel 60M (0.04–0.063 mm) from Macherey-Nagel. Melting points were determined on an Olympus BX41 polarization microscope and are uncorrected. <sup>1</sup>H NMR spectra were recorded on Bruker Advance 400 or Bruker Advance DMX 600 and calibrated to the residual solvent peak. All chemical shifts are in ppm. High-resolution mass spectra (ESI) were recorded on an ESI MicroTOF Focus spectrometer from Bruker Daltonics. Elemental analyses were performed on a CHNS 932 analyzer (Leco Instruments GmbH, Mönchengladbach, Germany). For all spectroscopic measurements, spectroscopic grade solvents (Uvasol) from Merck (Hohenbrunn, Germany) were used. UV/vis spectra of the synthesized compounds were recorded on a Perkin Elmer UV/vis spectrometer Lambda 950, Perkin Elmer UV/vis spectrometer Lambda 35 and Perkin Elmer UV/vis spectrometer Lambda 40P.

### 1.2 Synthesis

#### 1.2.1 Synthesis of the bis(pyridone) precursor **2**

To a suspension of 12.1 g (44.8 mmol) of the diamide **1** in 20 mL piperidine was added 35.0 g (269 mmol) ethyl acetoacetate and the resulting mixture was heated at 100 °C for 2.5 h. After being cooled to room temperature, the pH value was adjusted to 1 with 32% aqueous HCl. The precipitated product **2** was separated by filtration, washed with plenty of water and dried in vacuo.

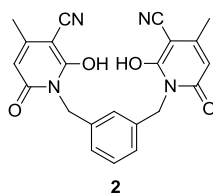

Yield: 13.9 g (34.5 mmol, 77%), colorless solid.

mp.: >300 °C, decomposition.

$^1\text{H}$  NMR (400 MHz,  $\text{d}_6$ -DMSO):  $\delta$  = 7.23 (t,  $^3J$  = 7.7 Hz, 1H), 7.09 (t,  $^4J$  = 1.4 Hz, 1H), 7.05 (dd,  $^3J$  = 7.7 Hz,  $^4J$  = 1.4 Hz, 2H), 5.57 (s, 2H), 5.05 (s, 4H), 2.21 (s, 6H).

HRMS (EI):  $m/z$  402.13190  $[\text{M}]^+$  (calcd. for  $\text{C}_{22}\text{H}_{18}\text{N}_4\text{O}_4^+$  402.13226).

### 1.2.2 Synthesis of the bis(merocyanine) dye **4**

A mixture of 200 mg (0.50 mmol) bis(pyridone) **2** and of 262 mg (1.09 mmol) 5-(dibutylamino)-thiophene-2-carbaldehyde **3** in 2 mL  $\text{Ac}_2\text{O}$  was stirred at 90 °C for 30 min. The reaction mixture was treated with MeOH and *i*-PrOH. The solvent was evaporated and the residue was subjected to column chromatography (silica,  $\text{CH}_2\text{Cl}_2/\text{MeOH}$  100/1.5). Subsequent precipitation from dichloromethane/*n*-hexane afforded the pure product.

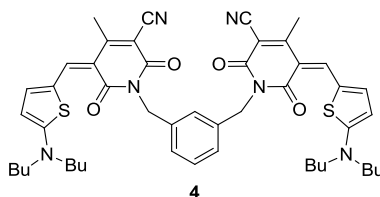

Yield: 259 mg (0.31 mmol, 61%), red solid.

mp.: 283 °C.

$^1\text{H}$  NMR (400 MHz,  $\text{CD}_2\text{Cl}_2$ ):  $\delta$  = 7.53 (s, 2H), 7.52 (d,  $^3J$  = 5.3 Hz, 2H), 7.32 (s, 1H), 7.20–7.17 (m, 3H), 6.41 (d,  $^3J$  = 5.3 Hz, 2H), 5.13 (s, 4H), 3.54 (t,  $^3J$  = 7.6 Hz, 8H), 2.42 (s, 6H), 1.77–1.68 (m, 8H), 1.46–1.36 (m, 8H), 0.98 (t,  $^3J$  = 7.4 Hz, 12H).

$^{13}\text{C}$  NMR (151 MHz,  $\text{CD}_2\text{Cl}_2$ ):  $\delta$  = 176.61, 163.62, 162.50, 158.63, 152.65, 142.18, 138.20, 128.44, 127.15, 126.35, 124.89, 117.77, 111.39, 107.03, 94.55, 54.33, 42.90, 29.61, 20.41, 19.02, 13.94.

HRMS (ESI, pos. mode, acetonitrile/chloroform):  $m/z$  844.37989  $[\text{M}]^+$  (calcd. for  $\text{C}_{48}\text{H}_{56}\text{N}_6\text{O}_4\text{S}_2^+$  844.37990).

UV/vis ( $\text{CH}_2\text{Cl}_2$ ,  $c = 4.9 \times 10^{-6} \text{ M}$ ):  $\lambda_{\text{max}} / \text{nm}$  ( $\epsilon_{\text{max}} / \text{L mol}^{-1} \text{ cm}^{-1}$ ) = 539 (255600).

CHN analysis (%): calculated for  $\text{C}_{48}\text{H}_{56}\text{N}_6\text{O}_4\text{S}_2$ : C, 68.22; H, 6.68; N, 9.94; S, 7.59; found: C, 68.04; H, 6.64; N, 9.98; S, 7.78.

## 2 UV/vis absorption spectra

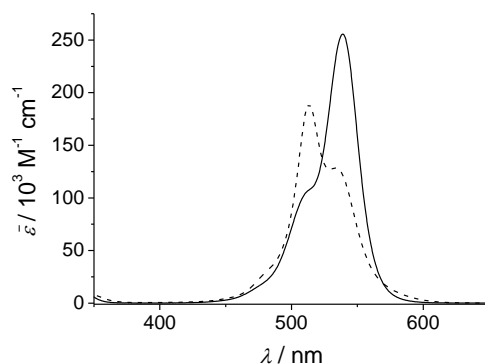

**Fig. S1** UV/vis absorption spectra of bis(merocyanine) dye **4** in dichloromethane (solid line,  $c = 4.9 \times 10^{-6} \text{ M}$ ) and in dioxane (dashed line,  $c = 1.2 \times 10^{-5} \text{ M}$ ) at 25 °C.

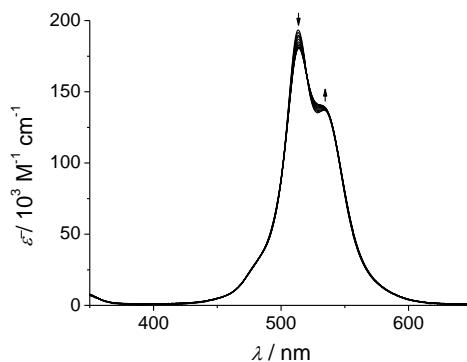

**Fig. S2** Temperature-dependent UV/vis absorption spectra of bis(merocyanine) dye **4** in dioxane ( $c = 1.5 \times 10^{-6} \text{ M}$ ). Arrows indicate the spectral changes upon increasing the temperature from 20 to 70 °C.

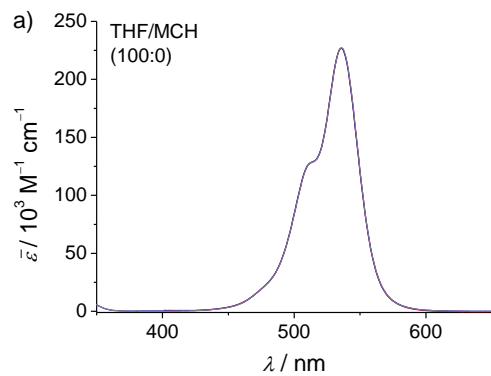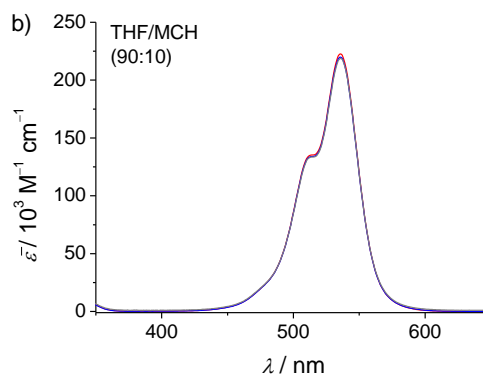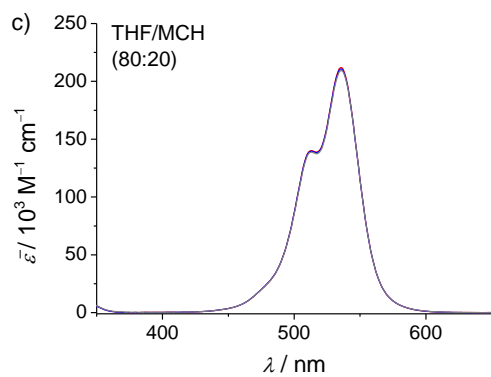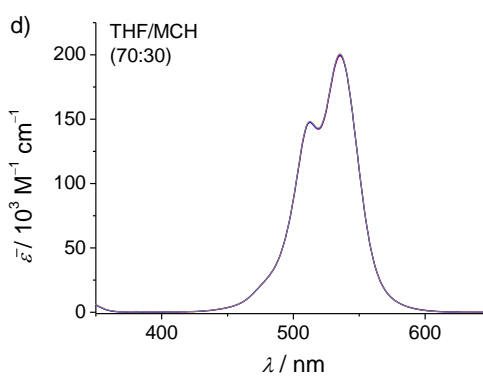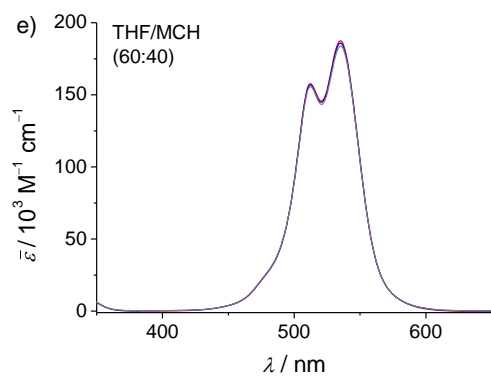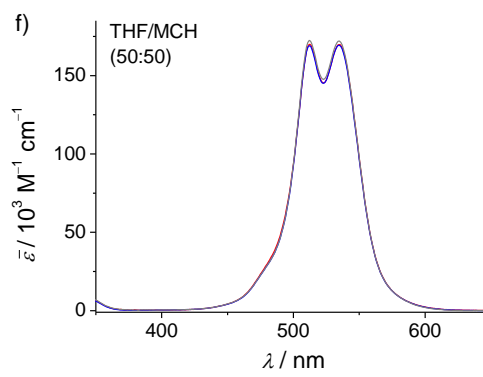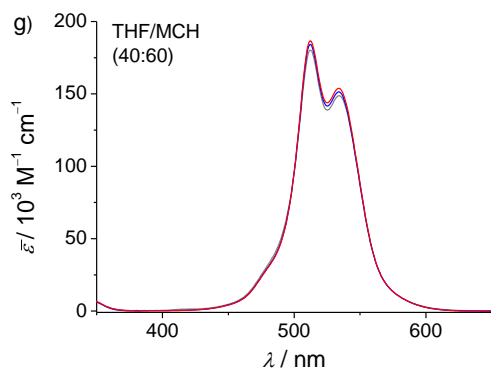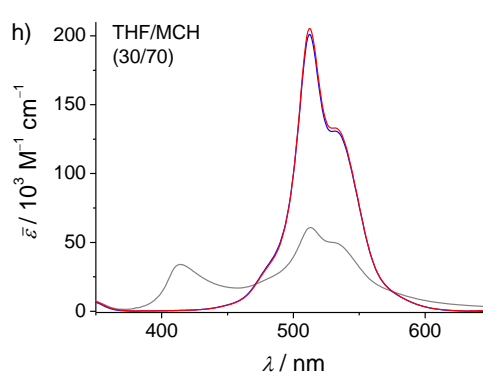

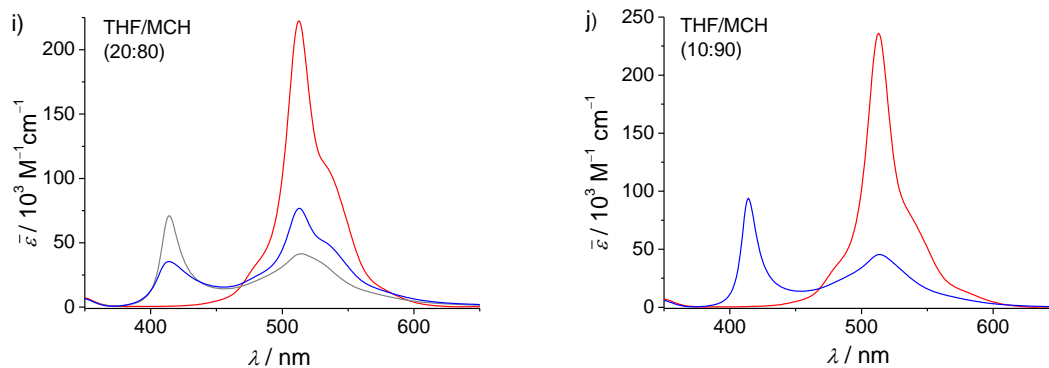

**Fig. S3** UV/vis spectra of bis(merocyanine) dye **4** in THF/MCH mixtures at different concentrations of  $c = 1 \times 10^{-6}$  M (red line),  $c = 5 \times 10^{-6}$  M (blue line) and  $c = 2 \times 10^{-5}$  M (grey line) and varying solvent composition: (a) 100% THF; (b) 90% THF; (c) 80% THF; (d) 70% THF; (e) 60% THF; (f) 50% THF; (g) 40% THF; (h) 30% THF; (i) 20% THF; (j) 10% THF (grey line is missing due to precipitation at  $c = 2 \times 10^{-5}$  M).

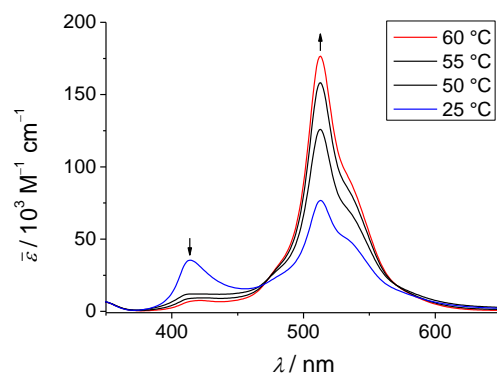

**Fig. S4** Temperature-dependent UV/vis spectra of dye **4** in a THF/MCH = 20:80 mixture ( $c = 5 \times 10^{-6}$  M).

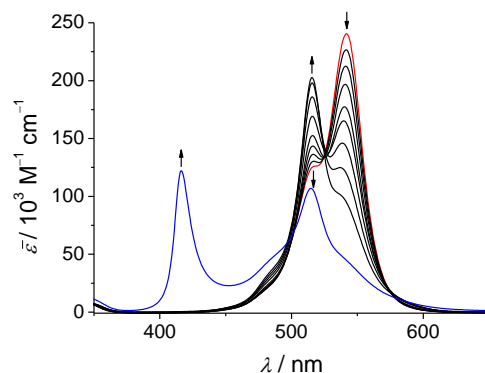

**Fig. S5** Solvent-dependent UV/vis spectra of dye **4** in  $\text{CHCl}_3/\text{MCH}$  mixtures ( $c = 1 \times 10^{-5}$  M) at 25 °C starting in pure  $\text{CHCl}_3$  (red line) and increasing the volume fraction of MCH in 10% steps. Arrows indicate the spectral changes upon increasing the volume fraction of MCH.

### 3 Structure elucidation by NMR spectroscopy

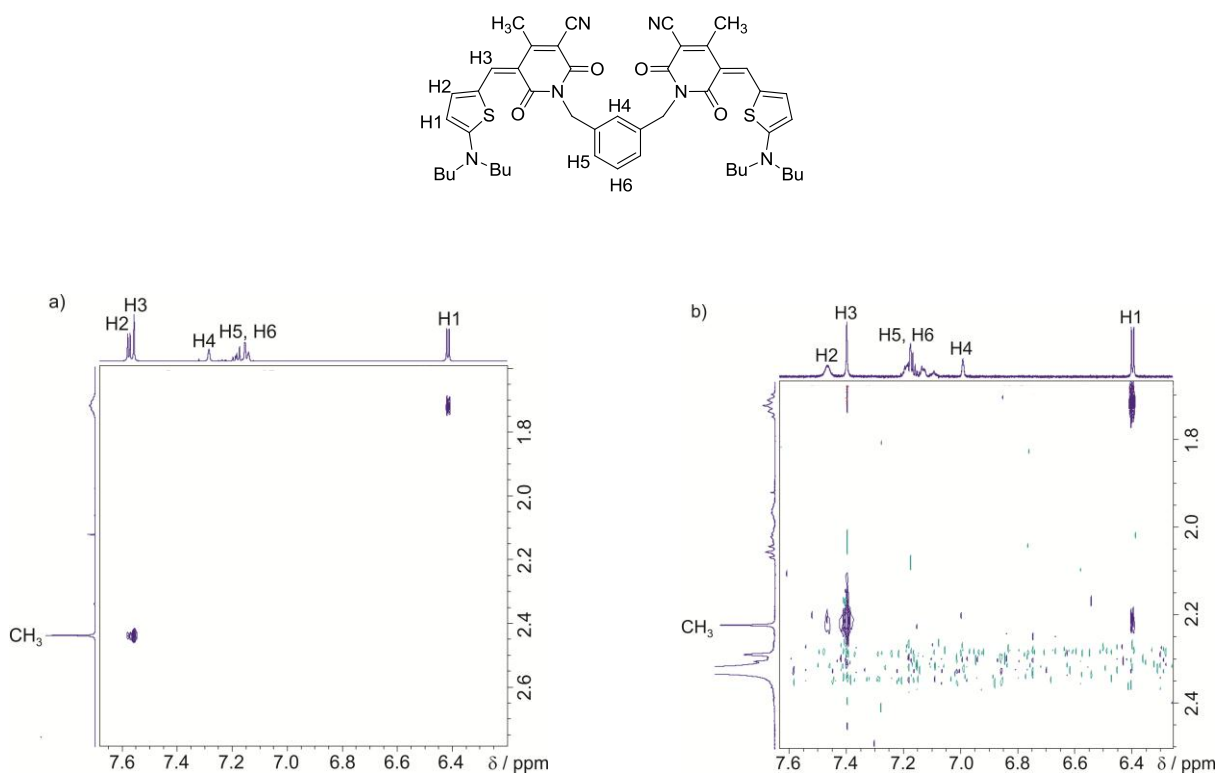

**Fig. S6** Selected areas of the 600 MHz ROESY NMR spectra of bis(merocyanine) dye **4** in (a) dichloromethane ( $c = 1.0 \times 10^{-3}$  M,  $T = 25$  °C) and (b) dioxane ( $c = 2.5 \times 10^{-4}$  M,  $T = 50$  °C).

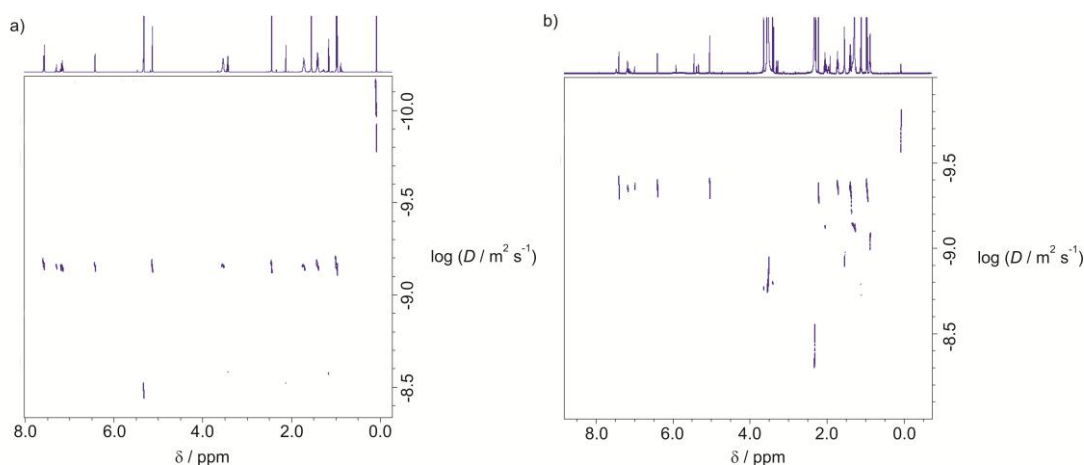

**Fig. S7** 600 MHz DOSY NMR spectra of bis(merocyanine) dye **4** in (a)  $CD_2Cl_2$  ( $c = 1.0 \times 10^{-3}$  M,  $T = 25$  °C) and in (b)  $dioxane-d_8$  ( $c = 2.5 \times 10^{-4}$  M,  $T = 50$  °C). The diffusion coefficients  $D$  (in  $m^2 s^{-1}$ ) are plotted on a logarithmic scale against the chemical shift  $\delta$ .



To estimate the size of bis(merocyanine) dye **4** in solution, the Stokes-Einstein equation (S1) for spherical particles has been applied

$$D = \frac{k_B T}{6\pi\eta r} \quad (\text{S1})$$

where  $D$  is the diffusion coefficient of the compound,  $k_B$  the Boltzmann constant,  $T$  the temperature,  $\eta$  the viscosity of the solvent, and  $r$  the hydrodynamic radius of the molecule.

In dichloromethane a diffusion coefficient of  $D = 6.98 \times 10^{-10} \text{ m}^2/\text{s}$  was determined, whereas in dioxane a diffusion coefficient of  $D = 4.40 \times 10^{-10} \text{ m}^2/\text{s}$  was found for compound **4**.

With equation (S1) using tabulated values for solvent viscosities a hydrodynamic radius of the molecules of  $r = 7.59 \text{ \AA}$  in dichloromethane and  $r = 6.83 \text{ \AA}$  in dioxane were calculated. These values exclude the formation of oligomeric species in solution and corroborate the view of a smaller hydrodynamic radius for the folded state.

## 4 $K_{eq}$ and $\Delta G$ values for folding

For the thermodynamic analysis of the folding process a literature known procedure established by Moore was applied. The details for the derivation of the applied equations are given in literature.<sup>S2</sup> For the preceding two-state equilibrium of bis(merocyanine) dye **4** (S2)

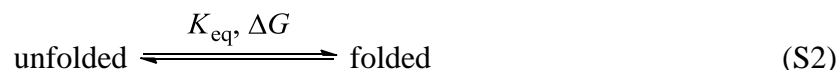

the quantitative thermodynamic values can be determined as follows: With the assumption that the absorbance values  $A_F$  obtained in the THF/MCH = 10:90 mixture and  $A_U$  obtained in pure THF coincide with the ideal spectra of the folded and unfolded dye **4**, the mole fraction of **4** in the unfolded state  $\alpha_{\text{unfolded}}$  can be calculated for all solvent compositions according to equation (S3).

$$\alpha_{\text{unfolded}} = \frac{A_F - A}{A_F - A_U} \quad (\text{S3})$$

The equilibrium constant  $K_{eq}$  and related Gibbs free energy changes  $\Delta G$  for the conformational switch between unfolded and folded state can be calculated by using equations (S4) and (S5).

$$K_{eq} = \frac{\alpha_{\text{folded}}}{\alpha_{\text{unfolded}}} = \frac{1 - \alpha_{\text{unfolded}}}{\alpha_{\text{unfolded}}} \quad (\text{S4})$$

$$\Delta G = -RT \ln K_{eq} \quad (\text{S5})$$

The free energy change between both conformational states is assumed to linearly depend on solvent composition in analogy to the solvent denaturation of proteins and peptide secondary structures.<sup>S3</sup> This allows to obtain the extrapolated free energy change in pure MCH by linear regression analysis of the experimental data points according to equation (S6).

$$\Delta G = \Delta G(\text{MCH}) - m[\text{THF}] \quad (\text{S6})$$

**Table S1** Thermodynamic data derived for the solvent-dependent folding of bis(merocyanine) dye **4**.

| Vol% THF in MCH | $K_{eq}$<br>(536 nm) | $K_{eq}$<br>(513 nm) | $\Delta G$ (536 nm) /<br>$\text{kJ mol}^{-1}$ | $\Delta G$ (513 nm) /<br>$\text{kJ mol}^{-1}$ |
|-----------------|----------------------|----------------------|-----------------------------------------------|-----------------------------------------------|
| 0               | -                    | -                    | -                                             | -                                             |
| 10              | -                    | -                    | -                                             | -                                             |
| 20              | 5.25                 | 6.69                 | -4.1                                          | -4.7                                          |
| 30              | 2.08                 | 2.41                 | -1.8                                          | -2.2                                          |
| 40              | 1.06                 | 1.16                 | -0.1                                          | -0.4                                          |
| 50              | 0.64                 | 0.66                 | 1.1                                           | 1.0                                           |
| 60              | 0.37                 | 0.38                 | 2.4                                           | 2.4                                           |
| 70              | 0.22                 | 0.23                 | 3.7                                           | 3.6                                           |
| 80              | 0.11                 | 0.14                 | 5.6                                           | 4.9                                           |
| 90              | 0.02                 | 0.08                 | 9.2                                           | 6.3                                           |
| 100             | -                    | -                    | -                                             | -                                             |

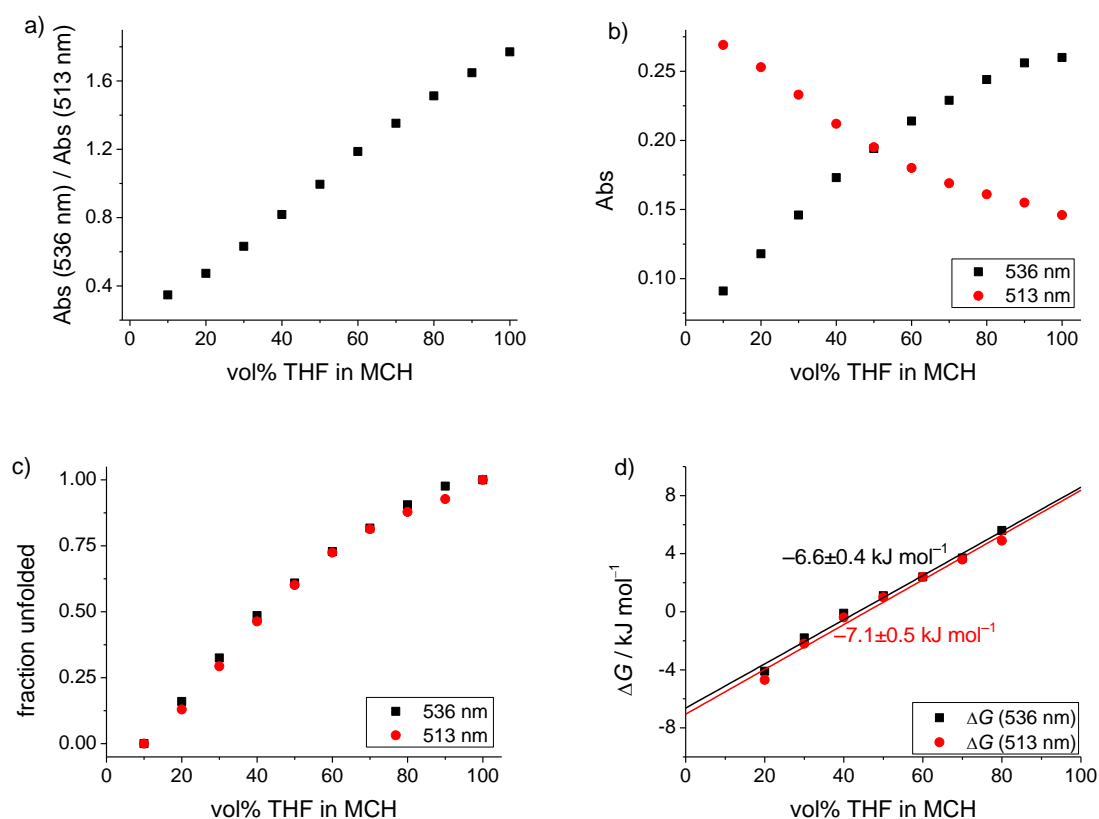

**Fig. S8** (a) Plot of the intensity ratios of the absorbance at 536 and 513 nm versus solvent composition. (b) Plot of the absorbance of **4** at 536 nm (■) and 513 nm (●) against the vol% of THF in MCH. (c) Plot of  $\alpha_{\text{unfolded}}$  of **4** at 536 nm and 513 nm against the vol% of THF in MCH. (d) Plot of the  $\Delta G$  values for the folding process of **4** derived from the spectral development at 536 nm and 513 nm. The black and the red lines are the respective fitting results from linear regression analysis.

## 5 BHJ solar cells

### 5.1 Device fabrication and characterization

All devices were fabricated on commercial indium-tin oxide (ITO) coated glass. The ITO was etched with  $\text{FeCl}_3/\text{HCl}$  solution and subsequently cleaned using chloroform, acetone, mucasol detergent and de-ionized water in ultrasonic bath. As next, the ITO substrates were exposed to ozone for 20 minutes and immediately coated with poly(3,4-ethylene dioxythiophene):poly(styrene sulfonate) (PEDOT:PSS) (Clevios Al 4083, Heraeus; ca. 40 nm). Afterwards, the samples were heat treated for 2 minutes at 110 °C to remove residual water and transferred into a  $\text{N}_2$  glove box for the fabrication of devices and measurements.

The dye and PCBM ( $\geq 99.5\%$ , Nano-C) were separately dissolved ( $10 \text{ mg mL}^{-1}$  each) in chloroform ( $\geq 99.8\%$ , Sigma Aldrich). The solutions were mixed with specific volumes to give the desired donor:acceptor weight ratio. The secondary solvent (toluene,  $\geq 99.9\%$  Merck; *o*-xylene,  $>98\%$  Fluka; chlorobenzene,  $99.9\%$  Sigma Aldrich; *o*-dichlorobenzene,  $>98\%$  Fluka) was added to the blend solutions yielding a volume fraction of 20%. For more accurate comparison, the same volume of chloroform was added for devices processed without solvent additive. Film thickness was adjusted by regulating the rotation speed for spin-coating. The substrates were transferred to a high-vacuum chamber where the top electrodes were evaporated. Here, a 120 nm thick Al (99.9% Alfa Aesar) layer was deposited through a mask. On each substrate, seven solar cells with an active area of  $0.0785 \text{ cm}^2$  are obtained.

The *JV*-characteristics of the solar cells were measured using a Keithley 2425 source measurement unit with simulated AM1.5 sun light provided by a filtered Xe lamp. The intensity of  $100 \text{ mW cm}^{-2}$  of the light was determined by using a calibrated inorganic solar cell from the Fraunhofer Institute for solar research (ISE) in Freiburg, Germany and a reference P3HT:PCBM cell measured by the same institute. No spectral mismatch factor was included in the calculation of the efficiency. The *EQE* measurements were performed using an Oriel QE/IPCE Measurement Kit. Thin film absorption spectra were taken with a Varian Cary 50 UV/vis spectrometer. The absorption of glass/ITO/PEDOT:PSS was used for baseline correction. Layer thicknesses were determined with a Dektak surface profiler (Veeco).

## 5.2 UV/vis and BHJ solar cell data

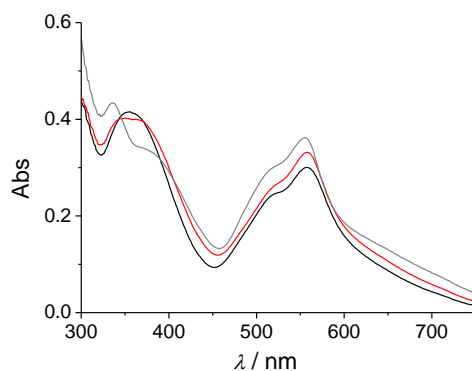

**Fig. S9** Thin film absorption spectra of **4**:PCBM (30:70) blends in dependence on the casting solvent mixture  $\text{CHCl}_3$  (black line),  $\text{CHCl}_3/\text{chlorobenzene}$  (red line) and  $\text{CHCl}_3/o\text{-dichlorobenzene}$  (grey line).

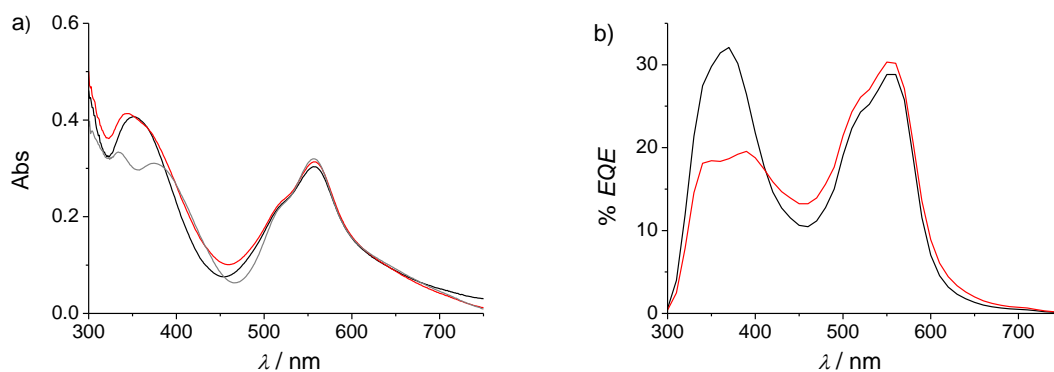

**Fig. S10** (a) Thin film absorption and (b) EQE spectra of **5**:PCBM (30:70) blends in dependence on the casting solvent mixture  $\text{CHCl}_3$  (black line),  $\text{CHCl}_3/\text{toluene}$  (red line) and  $\text{CHCl}_3/o\text{-xylene}$  (grey line).

**Table S2** Device characteristics of **5**:PCBM (30:70) BHJ solar cells in dependence on the solvent mixture under AM1.5,  $100 \text{ mW/cm}^{-2}$  illumination.

| solvent mixture (vol%)                 | $V_{oc}$ /V | FF   | $J_{sc}$ / $\text{mA cm}^{-2}$ | $J_{sc}(EQE)$ / $\text{mA cm}^{-2}$ | % PCE |
|----------------------------------------|-------------|------|--------------------------------|-------------------------------------|-------|
| $\text{CHCl}_3$                        | 0.83        | 0.34 | 2.58                           | 2.72                                | 0.73  |
| $\text{CHCl}_3/\text{toluene}$ (80:20) | 0.78        | 0.34 | 2.72                           | 2.87                                | 0.73  |

The theoretical  $J_{SC}(EQE)$  values were calculated by integration using equation (S7)

$$J_{SC}(EQE) = e \int EQE(\lambda) \cdot N_{ph}(\lambda) d\lambda \quad (S7)$$

where  $e$  represents the elementary electric charge,  $N_{ph}(\lambda)$  is the AM1.5 solar photon flux and  $EQE(\lambda)$  is the measured external quantum efficiency.

The calculated  $J_{SC}(EQE)$  values showed excellent agreement with the measured photocurrents in the solar cells (see Table S2).

# **$^1\text{H}$ NMR spectra**

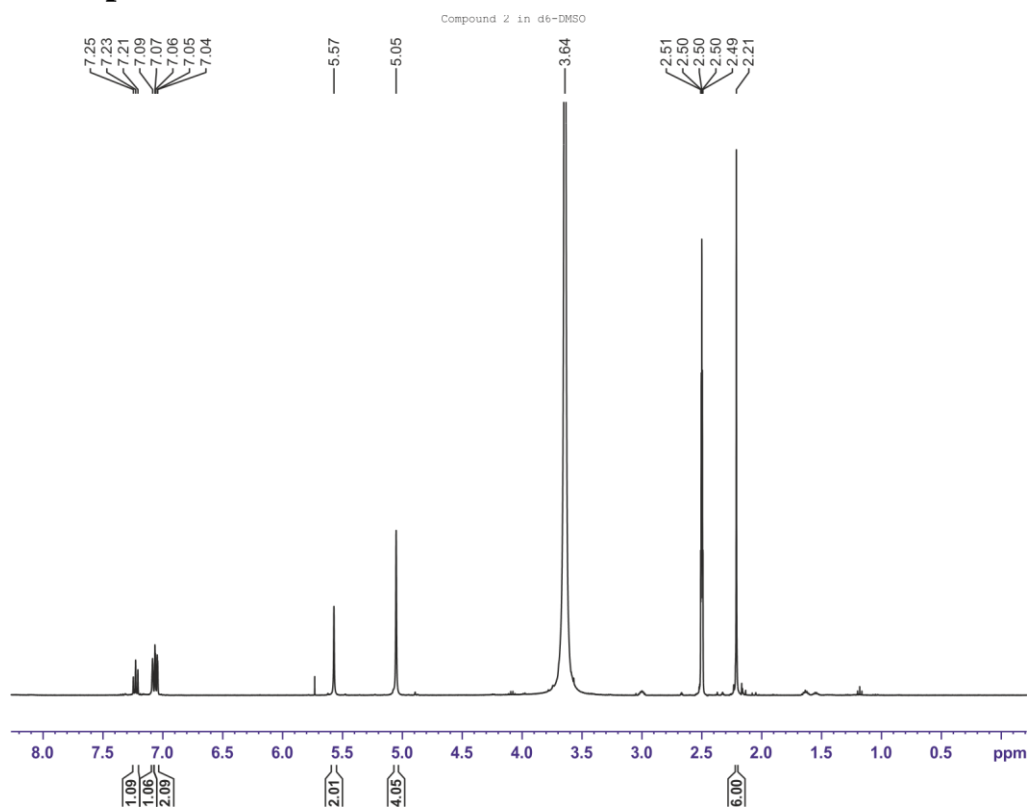

**Fig. S11**  $^1\text{H}$  NMR spectrum of compound **2** in  $\text{d}_6\text{-DMSO}$ .

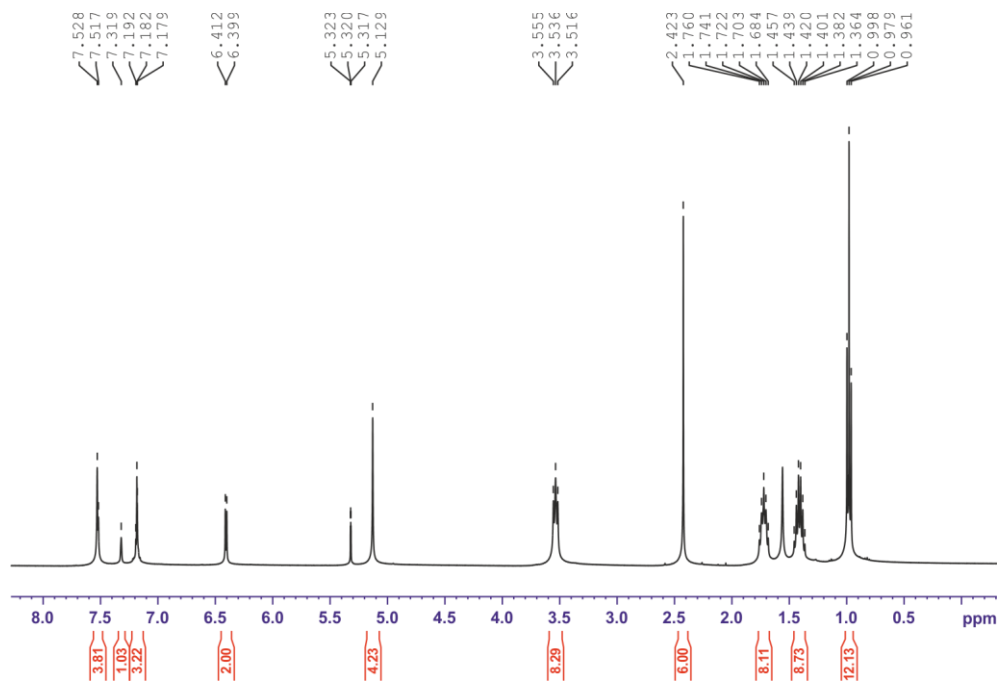

**Fig. S12**  $^1\text{H}$  NMR spectrum of compound **4** in  $\text{CD}_2\text{Cl}_2$ .

## 7 Additional references

- S1. A. Gazit, N. Osherov, C. Gilon, A. Levitzki, *J. Med. Chem.* **1996**, 39, 4905–4911.
- S2. C. R. Ray, J. S. Moore, *Adv. Polym. Sci.* **2005**, 177, 91–149.
- S3. C. N. Pace, B. A. Shirley, J. A. Thompson, *Protein Structure: A Practical Approach*, IRL Press, New York, 1989.
